# Supplementary material for: Phase-contrast microtomography unveils mechanisms of root colonization by a vascular fungal pathogen
Source: Research Square preprint supplement (doi:10.21203/rs.3.rs-6567296/v1), 2025-05-12
Supplement: Supplementary file 1 [file c48f7740390bdbed37bccd5c.pdf]

## Supplementary Video Legends

**Supplementary Video 1. Cross sections from a phase contrast X-ray micro-CT scan of *Solanum lycopersicum* roots 5-days post inoculation (DPI) with *F. oxysporum*.** The movie shows progressive slices through the infected root tissue, revealing fungal colonization patterns and the formation of air-filled spaces associated with fungal proliferation. Note that bright (white) areas correspond to fungal structures while black regions correspond to air-filled spaces. The visualization corresponds to the structures described in Figure 1. Images were acquired at the SYRMEP beamline at Elettra synchrotron using propagation-based phase-contrast imaging.

**Supplementary Video 2. Three-dimensional rotational movie of *F. oxysporum* appressoria-like structures (ALS) and needle-shaped invasive hyphae (IH) penetrating a cellophane membrane.** Three-dimensional rotational movie of *F. oxysporum* hyphae expressing three copies of the cytoplasmic fluorophore Fo-mClover3 (green) imaged directly on a cellophane membrane after 3 days of growth on MM. Note the enlarged bulbous appressoria-like structures (ALS) and thinner needle-shaped invasive hyphae (IH) stemming out of them. Imaging was performed on a Stellaris 5 inverted scanning confocal microscope equipped with a HC PL APO 63x/1,40-0,60 oil objective and a White Light Laser.
